# Supplementary material for: Early Intervention of Pulmonary Rehabilitation for Fibrotic Interstitial Lung Disease Is a Favorable Factor for Short-Term Improvement in Health-Related Quality of Life
Source: MDPI journal article supplement (doi:10.3390/jcm10143153), 2021-07-16
Supplement: s1 [file jcm-1285813-supplementary.pdf › jcm-1285813-supplementary.pdf]

## Supplementary Materials

**Table S1.** Differences between baseline values and 6MWD and SGRQ total score.

|                     |         | 6MWD, m             | <i>P</i> value | SGRQ total       | <i>P</i> value |
|---------------------|---------|---------------------|----------------|------------------|----------------|
| Gender              | Male    | 307.0 (243.8–281.4) | 0.018*         | 46.9 (33.7–68.7) | 0.17           |
|                     | Female  | 232.5 (193.8–249.8) |                | 57.8 (54.1–67.3) |                |
| FILD subtype        | IPF     | 280.0 (245.0–318.0) | 0.012*         | 53.0 (38.1–65.3) | 0.53           |
|                     | Non-IPF | 225.0 (192.5–241.5) |                | 61.4 (43.0–68.4) |                |
| mMRC scale          | 0–2     | 311.5 (270.0–335.0) | 0.022*         | 38.0 (31.9–50.0) | 0.0050*        |
|                     | 3–4     | 244.0 (217.2–268.5) |                | 65.0 (53.0–77.2) |                |
| Therapy at baseline |         |                     |                |                  |                |
| Corticosteroid      | With    | 264.0 (243.0–315.0) | 0.59           | 70.9 (43.6–77.3) | 0.21           |
|                     | Without | 268.0 (215.0–313.0) |                | 53.0 (37.7–55.9) |                |
| Anti-fibrotic agent | With    | 306.0 (254.0–330.5) | 0.35           | 53.0 (38.2–73.2) | 0.86           |
|                     | Without | 255.0 (225.0–308.0) |                | 53.0 (38.0–65.0) |                |
| LTOT                | With    | 245.0 (195.0–318.0) | 0.57           | 70.9 (53.2–77.3) | 0.020*         |
|                     | Without | 270.0 (240.0–311.5) |                | 46.0 (35.0–55.9) |                |

Data are presented as median (interquartile range). \**P* < 0.05.

FILD, fibrosing interstitial lung disease; mMRC, modified Medical Research Council; 6MWD, 6-minute walk distance;

LTOT, long-term oxygen therapy; SGRQ, St. George's Respiratory Questionnaire.

**Table S2.** Differences between baseline values and response to pulmonary rehabilitation

|                     |         | Δ6MWD, m          | <i>P</i> value | ΔSGRQ total     | <i>P</i> value |
|---------------------|---------|-------------------|----------------|-----------------|----------------|
| Gender              | Male    | 8.5 (−11.8–50.0)  | 0.63           | −2.6 (−6.1–2.4) | 0.29           |
|                     | Female  | 8.5 (−6.3–22.3)   |                | 3.8 (−1.8–7.2)  |                |
| FILD subtype        | IPF     | 16.0 (−10.0–50.0) | 0.47           | −1.6 (−5.0–3.5) | 0.71           |
|                     | Non-IPF | 6.0 (−2.5–11.5)   |                | −3.6 (−9.6–4.0) |                |
| mMRC scale          | 0–2     | 13.5 (3.8–56.0)   | 0.12           | −2.8 (−4.4–2.4) | 0.85           |
|                     | 3–4     | 2.5 (−30.3–32.5)  |                | 1.3 (−7.7–5.9)  |                |
| Therapy at baseline |         |                   |                |                 |                |
| Corticosteroid      | With    | 5.0 (−43.0–50.0)  | 0.69           | −3.0 (−5.0–0.4) | 0.55           |

|                     |         |                  |       |                  |      |
|---------------------|---------|------------------|-------|------------------|------|
|                     | Without | 12.0 (−2.5-37.0) |       | 0.1 (−5.5–3.9)   |      |
| Anti-fibrotic agent | With    | 40.0 (10.5-62.0) | 0.087 | −1.2 (−4.4–2.4)  | 0.84 |
|                     | Without | 5.0 (−10.0-32.0) |       | −2.3 (−8.4–7.2)  |      |
| LTOT                | With    | 16.0 (−7.0-50.0) | 0.57  | −3.6 (−6.1–−1.1) | 0.50 |
|                     | Without | 5.0 (−7.5-37.0)  |       | −0.3 (−4.3–3.9)  |      |

Data are presented as median (interquartile range).

FILD, fibrosing interstitial lung disease; mMRC, modified Medical Research Council; LTOT, long-term oxygen therapy;

6MWD, 6-minute walk distance; SGRQ, St. George's Respiratory Questionnaire.
